# Supplementary material for: Practice Matters: Pro-environmental Motivations and Diet-Related Impact Vary With Meditation Experience
Source: PubMed Central journal article supplement (PMC7772404; doi:10.3389/fpsyg.2020.584353), 2020-12-16
Supplement: Data_Sheet_1.pdf [file Data_Sheet_1.pdf]

## *Supplementary Material*

### **1 APPENDIX A - Environmental Impact indicator calculations**

Supplementary Material should be uploaded separately on submission. Please include any Based on the survey's statements of frequency, each of the respondents' environmental impact parameters (GHG emissions, land use, water use) were calculated per month in a stepwise approach:

1. **Create average impact values for food groups:** The WWF database contains impact values for a long list of products in each of the food groups meat, fish, eggs and dairy. In order to determine the impact associated with 100g units from these broader food groups, we used the average impact of all food products per food group. For example, the meat related GHG emissions are based on the averaged emissions for processed meat, beef, lamb, pork and poultry.
2. **Calculate monthly consumption per individual:** The WWF report found that in average, adults in the UK eat 92g/day of meat, 26g/day of fish, 196g/day of dairy and 8g/day of eggs (WWF, 2017, p. 46). These daily consumption values are multiplied by the self-reported frequency individuals stated to consume products from each food group, per month. The resulting values in grams are converted to units of 100g to match the WWF database, e. g. 392g of meat equals 3.92 units of 100g.
3. **Calculate monthly environmental impact per individual:** The individual monthly consumption values for each food group were finally multiplied with the previously calculated average values for GHG emissions, land use and water use per 100g of food.

The calculated values for the environmental impact refer exclusively to the consumption of animal-proteins and do not evaluate the overall sustainability of the individuals' complete diet. Factors such as personal preferences for local (vs) imported produce or for organic (vs) conventional agriculture have not been assessed on an individual level. Even though this might reduce the complexity and accuracy of the individual impact indicator, this decision is justified by publications advocating that large parts of the impact in the three categories GHG emissions, land-use and water use are associated to animal products and the production of feed for livestock (Harwatt, 2018; Springmann et al., 2018). A shift towards a more plant-based diet as recommended by national guidelines or seen in Mediterranean, pesco-vegetarian, vegetarian and vegan diets would not only improve the sustainability score but also the health score of the average diet (Behrens et al., 2017; Van Dooren, Marinussen, Blonk, Aiking, & Vellinga, 2014). However, a study examining the GHG emission values associated with different diet types in the UK finds that a complete vegan diet in average still accounts for 1055kg CO<sub>2</sub> per year, compared to 2624kg CO<sub>2</sub> per year for an omnivorous diet with high meat consumption (Scarborough et al., 2014).

To test the plausibility of our assumptions we compared the range of individual GHG emission values in our sample with the UK specific emission values associated with adult diets published by Scarborough et al. (2014). We compared their emission data related to individual meat consumption by subtracting the emissions associated with "fish-eaters" from both the "high meat-eaters" and the "low meat-eaters" diet scenarios (Scarborough et al., 2014, p. 185). The data published by Scarborough

et al. (2014) show that in the high meat scenario, approximately 1186kg CO<sub>2</sub>eq per year are emitted from meat alone while in the low meat scenario, the proportion reduces to 266.45kg CO<sub>2</sub>eq. By our indicator, a person with a high meat intake, eating meat five to seven times per week, scores 842kg CO<sub>2</sub>eq per year from meat only, versus a person eating meat only sporadically who emits approximately 70kg CO<sub>2</sub>eq per year from meat. This narrower range of emissions captured by our indicator most likely is due to the restricted number of self-report options which we averaged to monthly frequencies of eating meat on 0 days (never), 2 days (sporadically,

less than 4 times per month), 6 days (once or twice a week), 14 days (three to four times a week, every second day), and 24 days (five to seven times a week, daily) which provide a ceiling effect at the high end.

While our indicator reduces detail due to the five response categories provided in the questionnaire, it still allows for a higher level of accuracy in comparing individuals than simply requesting their diet type. For example, some meat eaters in our sample show a lower environmental impact than many pescatarians or vegetarians as depicted in Figure 2.

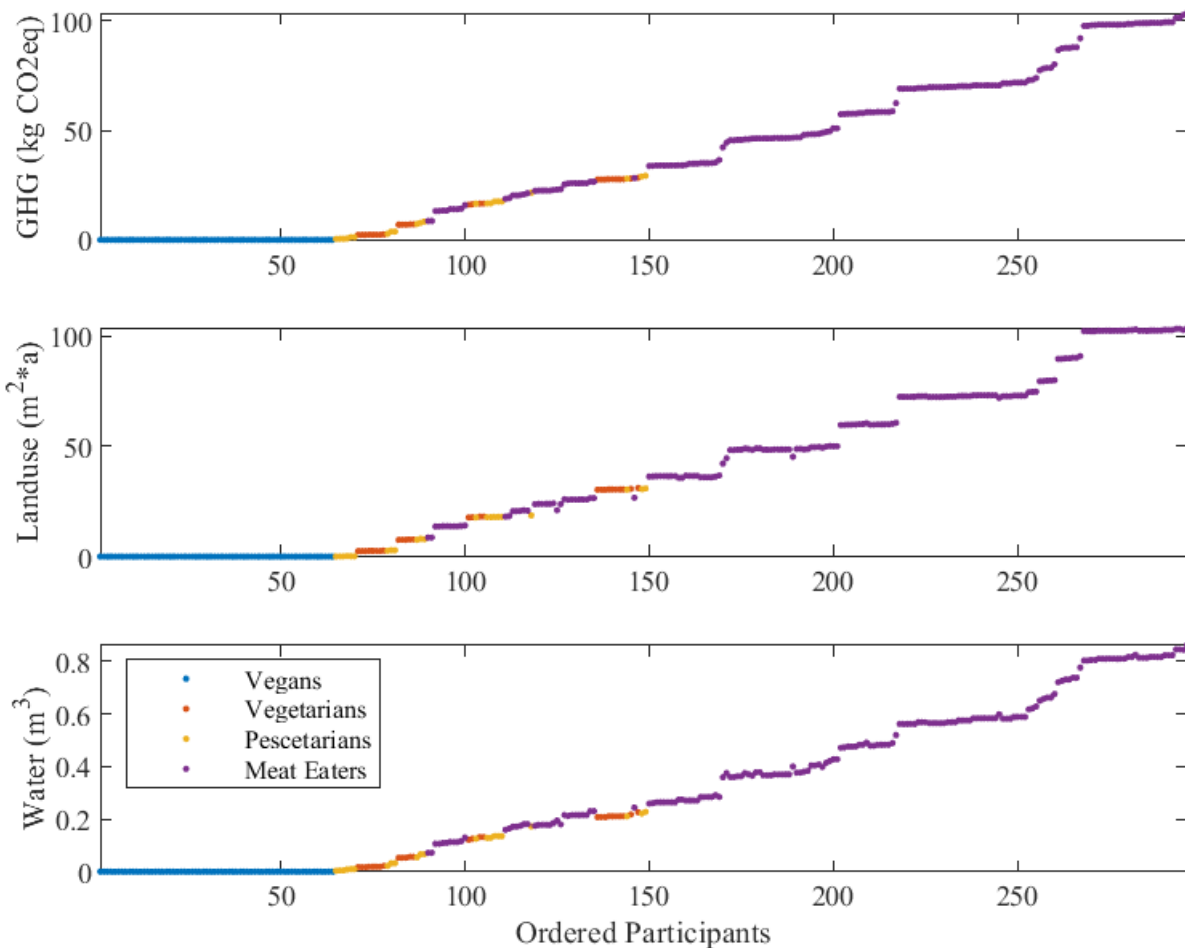

Figure 1: Environmental impact (GHG emissions, land use, water use) associated with individual diets in our sample of 307 respondents. The figure also shows that we gain much insight into individual dietary behavior by determining frequencies rather than working with respondents' diet types.

## 2 APPENDIX B - Full descriptive statistics and variable correlations

### Descriptive Statistics

|                         | N        | Minimu    | Maximu    | Mean      | Std.      | Varianc   | Skewness |      | Kurtosis |      |
|-------------------------|----------|-----------|-----------|-----------|-----------|-----------|----------|------|----------|------|
|                         | Statisti | Statistic | Statistic | Statistic | Statistic | Statistic | Statisti | Std. | Statisti | Std. |
| GHG emissions from      | 297      | .00       | 103.51    | 37.3634   | 33.26153  | 1106.32   | .468     | .141 | -1.046   | .282 |
| Land use from           | 297      | .00       | 103.59    | 38.7752   | 34.28392  | 1175.38   | .455     | .141 | -1.042   | .282 |
| Water from animal-      | 297      | .00       | .86       | .3069     | .27448    | .075      | .489     | .141 | -1.030   | .282 |
| Personal health         | 186      | .00       | 100.00    | 21.7419   | 20.10185  | 404.084   | 1.086    | .178 | 1.435    | .355 |
| Animal welfare          | 186      | .00       | 100.00    | 44.5699   | 26.71892  | 713.900   | .361     | .178 | -.651    | .355 |
| Environment and climate | 186      | .00       | 80.00     | 25.8871   | 18.44622  | 340.263   | .664     | .178 | .364     | .355 |
| Weight control          | 186      | .00       | 50.00     | 5.3817    | 10.48755  | 109.989   | 2.372    | .178 | 5.687    | .355 |
| Intrinsic motivation    | 274      | 1.00      | 7.00      | 4.5730    | 1.41232   | 1.995     | -.342    | .147 | -.343    | .293 |
| Integrated motivation   | 271      | 1.00      | 7.00      | 4.9271    | 1.57159   | 2.470     | -.442    | .148 | -.690    | .295 |
| Identified motivation   | 276      | 3.00      | 7.00      | 5.8877    | .93448    | .873      | -.722    | .147 | -.113    | .292 |
| Introjected             | 276      | 1.00      | 7.00      | 4.8234    | 1.39929   | 1.958     | -.480    | .147 | -.293    | .292 |
| External motivation     | 273      | 1.00      | 5.75      | 1.8974    | 1.07999   | 1.166     | 1.424    | .147 | 1.545    | .294 |
| Amotivation score       | 275      | 1.00      | 7.00      | 2.1655    | 1.19185   | 1.421     | 1.033    | .147 | .569     | .293 |
| Happiness Scale         | 299      | .75       | 6.75      | 4.2408    | 1.46209   | 2.138     | -.284    | .141 | -.667    | .281 |
| Connectedness with      | 299      | 1.57      | 5.00      | 3.8304    | .71457    | .511      | -.484    | .141 | -.319    | .281 |
| Mindfulness score       | 299      | 2.41      | 5.54      | 3.9024    | .58775    | .345      | .375     | .141 | -.355    | .281 |
| Meat reduction          | 300      | 0         | 2         | 1.37      | .491      | .241      | .441     | .141 | -1.590   | .281 |
| Valid N (listwise)      | 165      |           |           |           |           |           |          |      |          |      |

**Correlations (Hypothesis 1)**

|                                 |                     | Happiness Scale | Connectedness | Mindfulness score |
|---------------------------------|---------------------|-----------------|---------------|-------------------|
| Happiness Scale score           | Pearson Correlation | 1               | .355**        | .629**            |
|                                 | Sig. (2-tailed)     |                 | .000          | .000              |
|                                 | N                   | 299             | 298           | 298               |
| Connectedness with Nature score | Pearson Correlation | .355**          | 1             | .398**            |
|                                 | Sig. (2-tailed)     | .000            |               | .000              |
|                                 | N                   | 298             | 299           | 298               |
| Mindfulness score               | Pearson Correlation | .629**          | .398**        | 1                 |
|                                 | Sig. (2-tailed)     | .000            | .000          |                   |
|                                 | N                   | 298             | 298           | 299               |

\*\* . Correlation is significant at the 0.01 level (2-tailed).

**Correlations (Hypothesis 2)**

|                             |                 | Intrinsic | Integrated | Identified | Introjected | External | Amotivatio |
|-----------------------------|-----------------|-----------|------------|------------|-------------|----------|------------|
| Intrinsic motivation score  | Pearson         | 1         | .548**     | .373**     | .296**      | -.012    | -.157**    |
|                             | Sig. (2-tailed) |           | .000       | .000       | .000        | .845     | .010       |
|                             | N               | 274       | 267        | 273        | 273         | 269      | 272        |
| Integrated motivation score | Pearson         | .548**    | 1          | .556**     | .434**      | -.131*   | -.334**    |
|                             | Sig. (2-tailed) | .000      |            | .000       | .000        | .033     | .000       |
|                             | N               | 267       | 271        | 269        | 270         | 267      | 268        |
| Identified motivation score | Pearson         | .373**    | .556**     | 1          | .524**      | -.287**  | -.404**    |
|                             | Sig. (2-tailed) | .000      | .000       |            | .000        | .000     | .000       |
|                             | N               | 273       | 269        | 276        | 275         | 271      | 274        |

|                              |                 |         |         |         |        |        |        |
|------------------------------|-----------------|---------|---------|---------|--------|--------|--------|
| Introjected motivation score | Pearson         | .296**  | .434**  | .524**  | 1      | .061   | -.151* |
|                              | Sig. (2-tailed) | .000    | .000    | .000    |        | .314   | .012   |
|                              | N               | 273     | 270     | 275     | 276    | 271    | 274    |
| External motivation score    | Pearson         | -.012   | -.131*  | -.287** | .061   | 1      | .505** |
|                              | Sig. (2-tailed) | .845    | .033    | .000    | .314   |        | .000   |
|                              | N               | 269     | 267     | 271     | 271    | 273    | 270    |
| Amotivation score            | Pearson         | -.157** | -.334** | -.404** | -.151* | .505** | 1      |
|                              | Sig. (2-tailed) | .010    | .000    | .000    | .012   | .000   |        |
|                              | N               | 272     | 268     | 274     | 274    | 270    | 275    |

\*\* . Correlation is significant at the 0.01 level (2-tailed).

\* . Correlation is significant at the 0.05 level (2-tailed).

### Correlations (Hypothesis 3, motivations for meat reduction)

|                 |                     | Personal health | Animal welfare | Environment and climate | Weight control |
|-----------------|---------------------|-----------------|----------------|-------------------------|----------------|
| Personal health | Pearson Correlation | 1               | -.655**        | -.265**                 | .253**         |
|                 | Sig. (2-tailed)     |                 | .000           | .000                    | .000           |
|                 | N                   | 186             | 186            | 186                     | 186            |
| Animal welfare  | Pearson Correlation | -.655**         | 1              | -.348**                 | -.459**        |
|                 | Sig. (2-tailed)     | .000            |                | .000                    | .000           |
|                 | N                   | 186             | 186            | 186                     | 186            |

|                         |                     |         |         |         |         |
|-------------------------|---------------------|---------|---------|---------|---------|
| Environment and climate | Pearson Correlation | -.265** | -.348** | 1       | -.235** |
|                         | Sig. (2-tailed)     | .000    | .000    |         | .001    |
|                         | N                   | 186     | 186     | 186     | 186     |
| Weight control          | Pearson Correlation | .253**  | -.459** | -.235** | 1       |
|                         | Sig. (2-tailed)     | .000    | .000    | .001    |         |
|                         | N                   | 186     | 186     | 186     | 186     |

\*\* . Correlation is significant at the 0.01 level (2-tailed).

### Correlations (Hypothesis 3, environmental impact from animal-protein consumption)

|                                   |                     | GHG emissions | Land use from | Water from |
|-----------------------------------|---------------------|---------------|---------------|------------|
| GHG emissions from animal-protein | Pearson Correlation | 1             | .997**        | .996**     |
|                                   | Sig. (2-tailed)     |               | .000          | .000       |
|                                   | N                   | 297           | 297           | 297        |
| Land use from animal-protein      | Pearson Correlation | .997**        | 1             | .999**     |
|                                   | Sig. (2-tailed)     | .000          |               | .000       |
|                                   | N                   | 297           | 297           | 297        |
| Water from animal-protein         | Pearson Correlation | .996**        | .999**        | 1          |
|                                   | Sig. (2-tailed)     | .000          | .000          |            |
|                                   | N                   | 297           | 297           | 297        |

\*\* . Correlation is significant at the 0.01 level (2-tailed).

### 3 APPENDIX C – Hypothesis 2: non-significant results

The following motivation types were found to not show any significant differences between the three meditator groups: intrinsic motivation, identified motivation, introjected motivation and external motivation. The results are displayed in the following table.

Table 1: Games-Howell comparisons of four types of motivation towards the environment with non-significant results, including confidence intervals.

| <b>INTRINSIC MOTIVATION</b>           |          |      |           |                                                               |                          |   |
|---------------------------------------|----------|------|-----------|---------------------------------------------------------------|--------------------------|---|
|                                       |          |      |           | Games-Howell Comparisons (p-value)<br>[CI for the difference] |                          |   |
| Meditation Practice                   | <i>n</i> | Mean | <i>SD</i> | 1                                                             | 2                        | 3 |
| 1. Non-practitioner                   | 102      | 4.52 | 1.42      |                                                               |                          |   |
| 2. Infrequent/<br>Novice practitioner | 73       | 4.63 | 1.45      | .870<br>[-.406 - .626]                                        |                          |   |
| 3. Advanced practitioner              | 81       | 4.53 | 1.44      | .999<br>[-.509 - .494]                                        | .899<br>[-.447 - .651]   |   |
| <b>IDENTIFIED MOTIVATION</b>          |          |      |           |                                                               |                          |   |
|                                       |          |      |           | Games-Howell Comparisons (p-value)<br>[CI for the difference] |                          |   |
| Meditation Practice                   | <i>n</i> | Mean | <i>SD</i> | 1                                                             | 2                        | 3 |
| 1. Non-practitioner                   | 102      | 5.88 | .90       |                                                               |                          |   |
| 2. Infrequent/<br>Novice practitioner | 73       | 5.92 | 1.00      | .956<br>[-.303 - .387]                                        |                          |   |
| 3. Advanced practitioner              | 81       | 5.93 | .87       | .901<br>[-.253 - .367]                                        | .994<br>[-.3420 - .3728] |   |
| <b>INTROJECTED MOTIVATION</b>         |          |      |           |                                                               |                          |   |
|                                       |          |      |           | Games-Howell Comparisons (p-value)<br>[CI for the difference] |                          |   |
| Meditation Practice                   | <i>n</i> | Mean | <i>SD</i> | 1                                                             | 2                        | 3 |
| 1. Non-practitioner                   | 102      | 4.92 | 1.42      |                                                               |                          |   |
| 2. Infrequent/<br>Novice practitioner | 73       | 5.00 | 1.36      | .924<br>[-.576 - .417]                                        |                          |   |
| 3. Advanced practitioner              | 81       | 4.50 | 1.37      | .105<br>[-.067 - .908]                                        | .060<br>[-.017 - 1.017]  |   |
| <b>EXTERNAL MOTIVATION</b>            |          |      |           |                                                               |                          |   |
|                                       |          |      |           | Games-Howell Comparisons (p-value)<br>[CI for the difference] |                          |   |
| Meditation Practice                   | <i>n</i> | Mean | <i>SD</i> | 1                                                             | 2                        | 3 |
| 1. Non-practitioner                   | 102      | 2.00 | 1.19      |                                                               |                          |   |
| 2. Infrequent/<br>Novice practitioner | 73       | 1.98 | 1.03      | .996<br>[-.380 - .408]                                        |                          |   |
| 3. Advanced practitioner              | 81       | 1.70 | .93       | .148<br>[-.076 - .664]                                        | .181<br>[-.093 - .652]   |   |

#### 4 APPENDIX D – Hypothesis 3: meat reduction status (gender differences)

When analyzing the reduction status by gender, the distribution patterns change (Figure 2 and 3). In all practitioner groups, more females report reductions in their meat consumptions than non-reductions and group differences were not statistically significant  $\chi^2 (2, N = 186) = 4.85, p = .088$ .

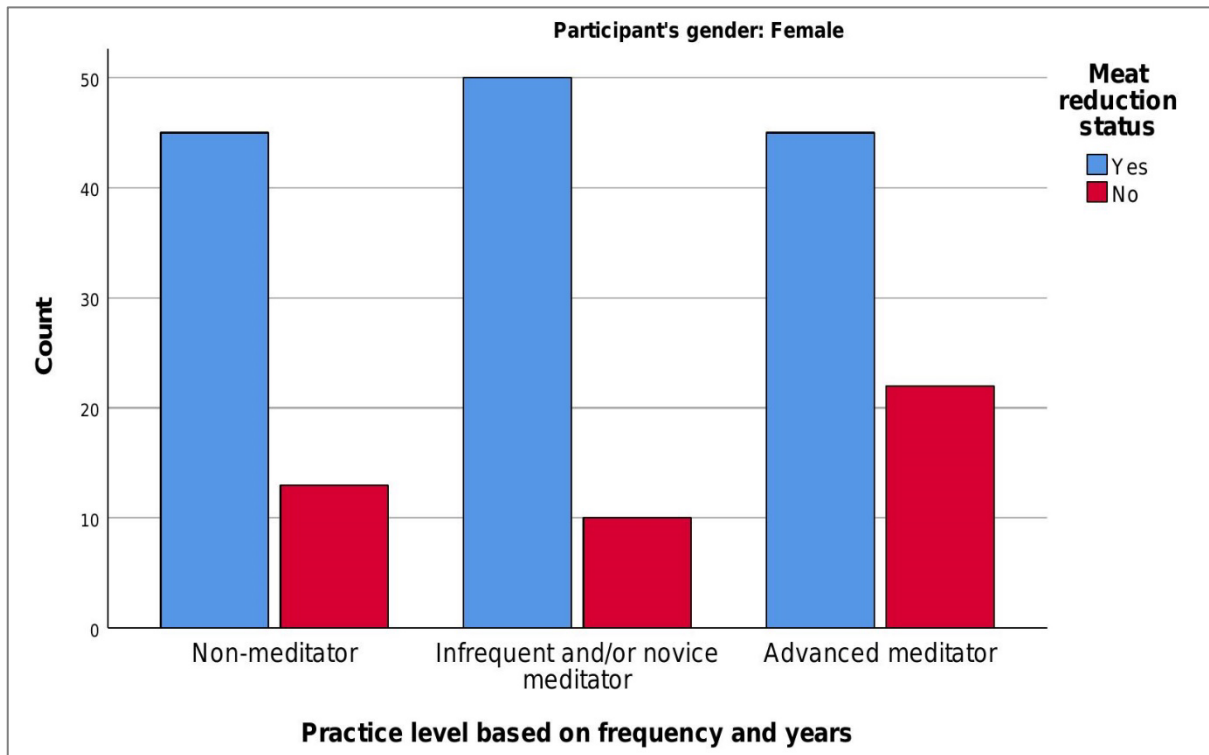

Figure 2. Animal-protein reduction statements of women: reduction levels are evenly distributed throughout the groups.

When observing male practitioner groups, more men state to not reduce their meat consumption in the non-practitioner group (47 non-reducers, 74.6%; 16 reducers, 25.4%). The proportion of non-reducers decreases slightly in the group of infrequent/novice practitioners (14 non-reducers, 63.6%; 8 reducers, 36.4%). However, in the advanced meditator group, more males report intentions to reduce meat consumption (5 non-reducers, 20%; 15 reducers, 80%). Group differences were statistically significant  $\chi^2 (2, N = 110) = 22.39, p < .001$ .



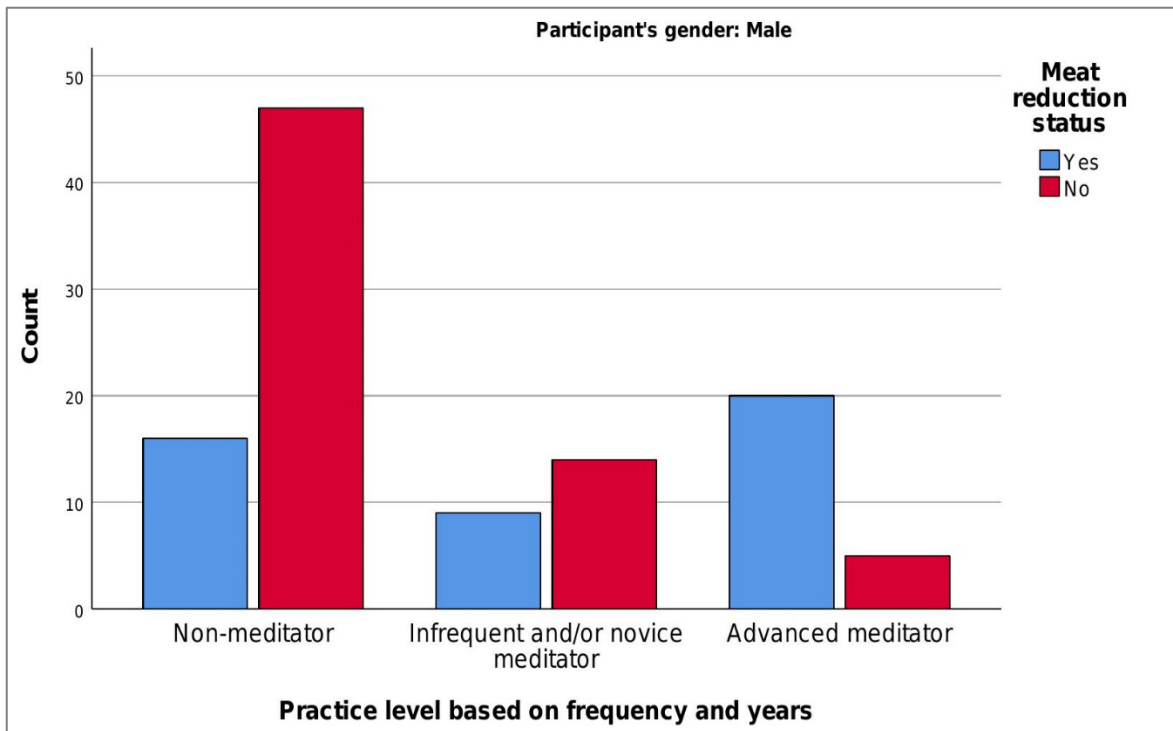

Figure 3 Animal-protein reduction statements of men: reduction levels increase with growing meditation experience.

## 5 APPENDIX E – Hypothesis 3: environmental impact (vegans excluded)

On the pages below we present excerpts from the SPSS script of the ANOVA on the environmental impact GHG emissions using the sample without Vegans. The groups result more clearly separated from each other and differences between all groups are significant. Respondents with advanced meditation experience emit significantly less GHG emissions linked to their animal-protein consumption.

The other environmental impacts (land occupation and water use) repeat the same pattern. To gain access to the rest of the script on the other indicators, please email the first author [ute.thiermann15@imperial.ac.uk](mailto:ute.thiermann15@imperial.ac.uk).

### Between-Subjects Factors

|                                             | Value | Label                              | N  |
|---------------------------------------------|-------|------------------------------------|----|
| Practice level based on frequency and years | .00   | Non-meditator                      | 95 |
|                                             | 1.00  | Infrequent and/or novice meditator | 56 |
|                                             | 2.00  | Advanced meditator                 | 80 |

### Descriptive Statistics

Dependent Variable: GHG emissions from animal-protein

| Practice level based on frequency and years | Mean    | Std. Deviation | N   |
|---------------------------------------------|---------|----------------|-----|
| Non-meditator                               | 59.7620 | 30.45141       | 95  |
| Infrequent and/or novice meditator          | 46.7159 | 28.69746       | 56  |
| Advanced meditator                          | 33.7571 | 25.55738       | 80  |
| Total                                       | 47.5933 | 30.46643       | 231 |

## Levene's Test of Equality of Error Variances<sup>a</sup>

Dependent Variable: GHG emissions from animal-protein

| F    | df1 | df2 | Sig. |
|------|-----|-----|------|
| .980 | 2   | 228 | .377 |

Tests the null hypothesis that the error variance of the dependent variable is equal across groups.

a. Design: Intercept + Gender\_num + Practice\_level

## Tests of Between-Subjects Effects

Dependent Variable: GHG emissions from animal-protein

| Source          | Type III Sum of Squares | df  | Mean Square | F      | Sig. | Partial Eta Squared | Noncent. Parameter | Observed Power <sup>b</sup> |
|-----------------|-------------------------|-----|-------------|--------|------|---------------------|--------------------|-----------------------------|
| Corrected Model | 38040.077 <sup>a</sup>  | 3   | 12680.026   | 16.406 | .000 | .178                | 49.218             | 1.000                       |
| Intercept       | 17686.645               | 1   | 17686.645   | 22.884 | .000 | .092                | 22.884             | .997                        |
| Gender_num      | 8614.447                | 1   | 8614.447    | 11.146 | .001 | .047                | 11.146             | .914                        |
| Practice_level  | 17576.629               | 2   | 8788.314    | 11.371 | .000 | .091                | 22.741             | .993                        |
| Error           | 175446.746              | 227 | 772.893     |        |      |                     |                    |                             |
| Total           | 736729.834              | 231 |             |        |      |                     |                    |                             |

|                 |            |     |  |  |  |  |  |
|-----------------|------------|-----|--|--|--|--|--|
| Corrected Total | 213486.823 | 230 |  |  |  |  |  |
|-----------------|------------|-----|--|--|--|--|--|

a. R Squared = .178 (Adjusted R Squared = .167)

b. Computed using alpha = .05

### Estimates

Dependent Variable: GHG emissions from animal-protein

| Practice level based on<br>frequency and years | Mean                | Std. Error | 95% Confidence Interval |             |
|------------------------------------------------|---------------------|------------|-------------------------|-------------|
|                                                |                     |            | Lower Bound             | Upper Bound |
| Non-meditator                                  | 57.266 <sup>a</sup> | 2.949      | 51.456                  | 63.076      |
| Infrequent and/or novice<br>meditator          | 47.694 <sup>a</sup> | 3.727      | 40.351                  | 55.037      |
| Advanced meditator                             | 36.036 <sup>a</sup> | 3.182      | 29.766                  | 42.307      |

a. Covariates appearing in the model are evaluated at the following values: Gender = 1.45.

### Pairwise Comparisons

Dependent Variable: GHG emissions from animal-protein

| (I) Practice level based on<br>frequency and years | (J) Practice level based on<br>frequency and years | Mean Difference<br>(I-J) | Std. Error | Sig. <sup>b</sup> | 95% Confidence Interval for<br>Difference <sup>b</sup> |             |
|----------------------------------------------------|----------------------------------------------------|--------------------------|------------|-------------------|--------------------------------------------------------|-------------|
|                                                    |                                                    |                          |            |                   | Lower Bound                                            | Upper Bound |
| Non-meditator                                      | Infrequent and/or novice<br>meditator              | 9.571 <sup>*</sup>       | 4.798      | .047              | .117                                                   | 19.026      |

|                                    |                                    |          |       |      |         |         |
|------------------------------------|------------------------------------|----------|-------|------|---------|---------|
|                                    | Advanced meditator                 | 21.229*  | 4.455 | .000 | 12.452  | 30.007  |
| Infrequent and/or novice meditator | Non-meditator                      | -9.571*  | 4.798 | .047 | -19.026 | -.117   |
|                                    | Advanced meditator                 | 11.658*  | 4.859 | .017 | 2.082   | 21.233  |
| Advanced meditator                 | Non-meditator                      | -21.229* | 4.455 | .000 | -30.007 | -12.452 |
|                                    | Infrequent and/or novice meditator | -11.658* | 4.859 | .017 | -21.233 | -2.082  |

Based on estimated marginal means

\*. The mean difference is significant at the .05 level.

b. Adjustment for multiple comparisons: Least Significant Difference (equivalent to no adjustments).
